# Supplementary material
Source: Research Square preprint supplement (doi:10.21203/rs.3.rs-9976459/v1)
Supplement: Supplementary file 1 [file 9453748b97b4bad378fd983d.docx]

## Supplemental Materials


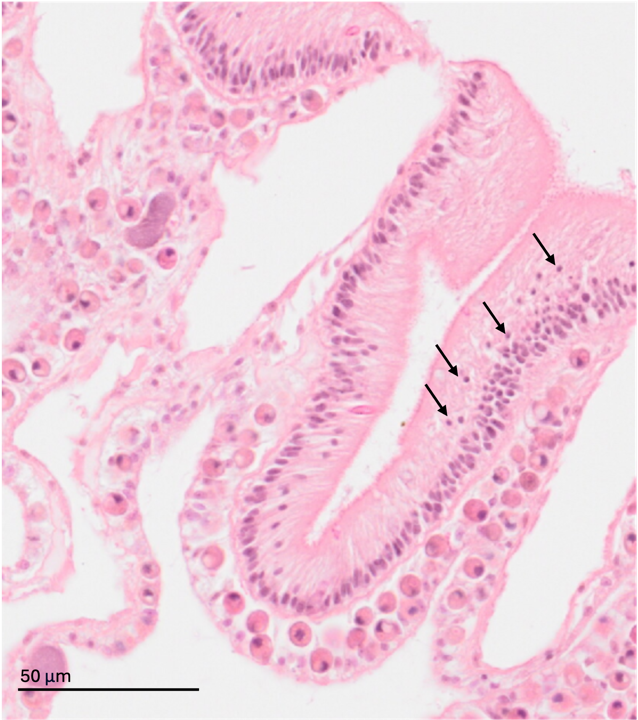


**Figure S1.** Example of necrotic tissue as evidenced by pyknotic nuclei. Black arrows point to pyknotic nuclei (shrinkage or condensation of a cell with increased nuclear compactness and/or density).

**
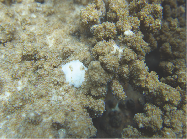
**

**Figure S2. Non-symbiotic Growth Anomaly.**

**
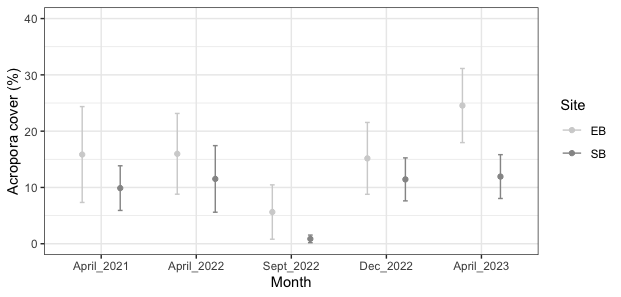
**

**Figure S3.** *Acropora* cover in the lagoon over time. Points is average benthic cover across six transects at each site at each time point, and lines are standard errors.

**
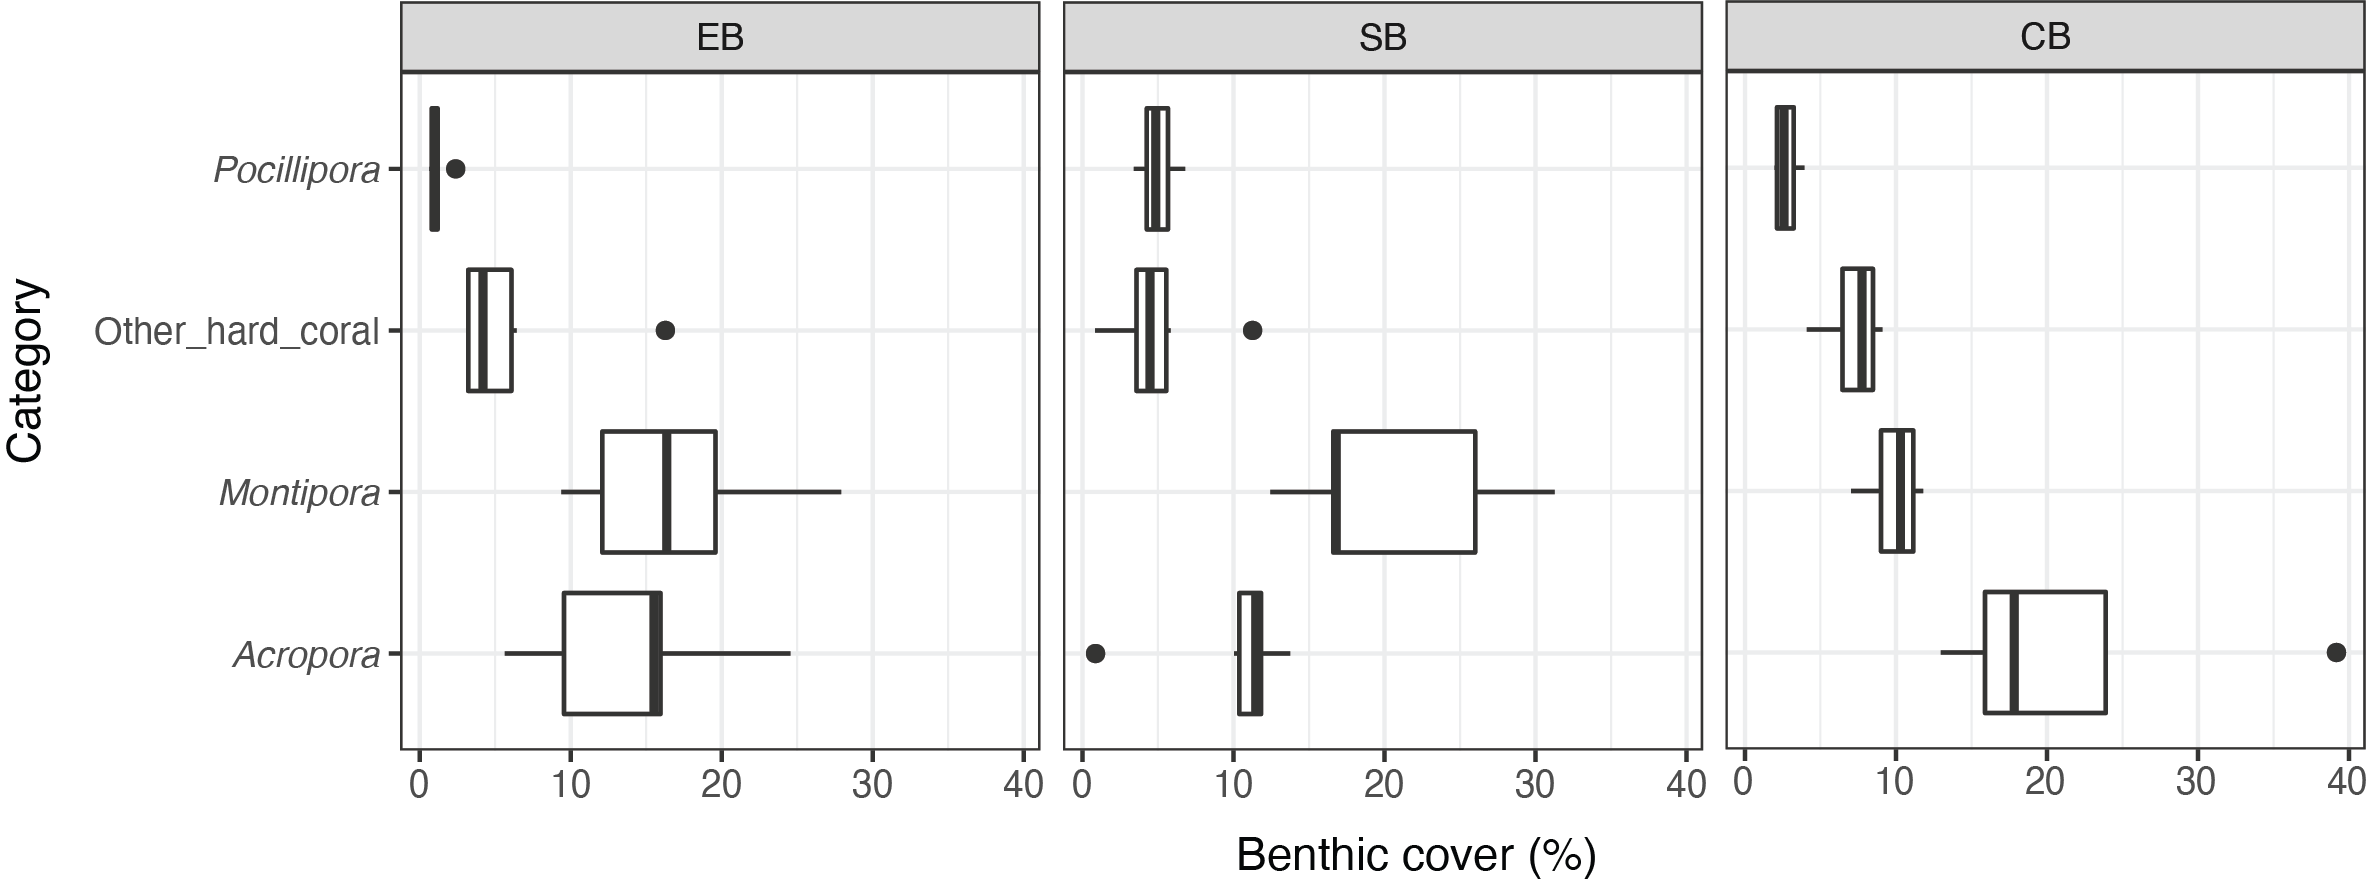
**

**Figure S4.** Hard coral cover at sites over time.

**
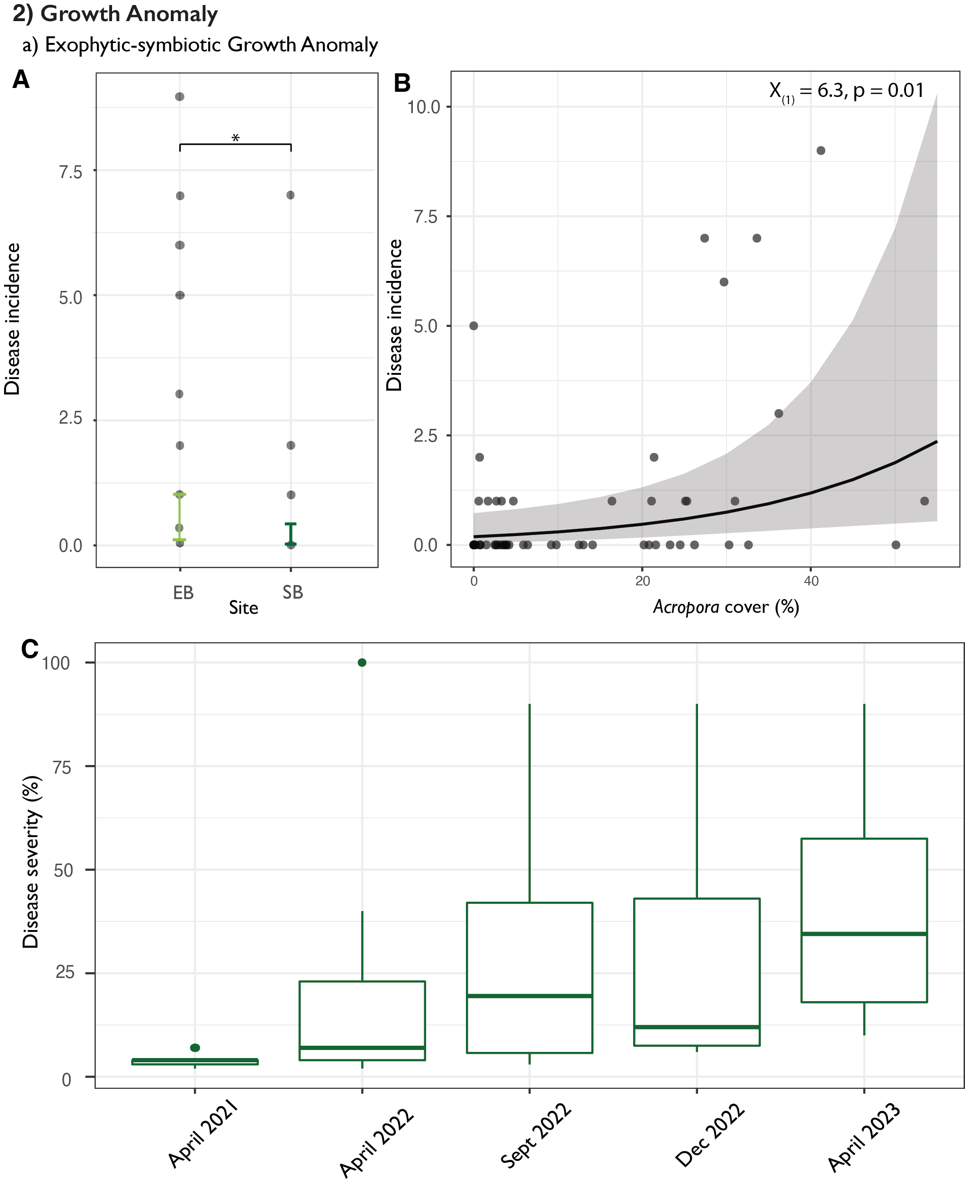
**

**Figure S5. A.** Prevalence of GAs over themonitoring period in EB and SB. **B.** Modelled relationship between site and disease incidence. **C.** Modelled relationship between Acropora cover and predicted counts of Growth Anomalies.

**Table S1.** Total colonies surveyed over study period in the lagoon and CB.

| **Time point** | **Lagoon (EB and SB)** | **CB** |
| --- | --- | --- |
| **April 2021** | 51 | NA |
| **April 2022** | 107 | 41 |
| **September 2022** | 119 | 44 |
| **December 2022** | 86 | 46 |
| **April 2023** | 119 | 62 |

**Table S2.** Paling prevalence glm, modelled with modelled with binomial family and counts specified as a weights argument. Pseudo R2 (delta) = 0.73

| Covariate | Chisq | Df | Pr(>Chisq) |
| --- | --- | --- | --- |
| Site | 1.16 | 1 | 0.28 |
| Month | 39.28 | 4 | < 0.001 |
| Acropora_cover | 0.51 | 1 | 0.47 |
| Site:Month | 3.96 | 4 | 0.41 |

**Table S3.** Acute sub-acute WSprevalence glm, modelled with binomial family and counts specified as a weights argument. Pseudo R2 (delta) = 0.84.

| Covariate | Chisq | Df | Pr(>Chisq) |
| --- | --- | --- | --- |
| Site | 1.29 | 1 | 0.26 |
| Month | 8.58 | 4 | 0.07 |
| Acropora_cover | 0.88 | 1 | 0.35 |
| Site:Month | 22.12 | 4 | < 0.001 |

**Table S4.** Acute sub-acute WSseverity glmm, linear model transect ID specified as random effects. R2 = 0.3

| Covariate | Chisq | Df | Pr(>Chisq) |
| --- | --- | --- | --- |
| Site | 1.32 | 1 | 0.25 |
| Month | 13.84 | 4 | 0.01 |
| Site:Month | 12.90 | 3 | < 0.01 |

**Table S5.** Paling WS with tissue lossprevalence glm, modelled with binomial family and counts specified as a weights argument. Pseudo R2 (delta) = 0.70.

| Covariate | Chisq | Df | Pr(>Chisq) |
| --- | --- | --- | --- |
| Site | 2.65 | 1 | 0.10 |
| Month | 6.54 | 4 | 0.16 |
| Acropora_cover | 1.74 | 1 | 0.19 |
| Site:Month | 12.97 | 4 | 0.01 |

**Table S6.** Paling WS with tissue losslog**(**severity) glmm, linear model transect ID specified as random effects. R2 = 0.42

| Covariate | Chisq | Df | Pr(>Chisq) |
| --- | --- | --- | --- |
| Site | 0.38 | 1 | 0.54 |
| Month | 4.52 | 4 | 0.34 |
| Site:Month | 4.1 | 1 | 0.04 |

**Table S7.** Growth anomalies prevalence glm, modelled with negative binomial family and log(counts) specified as an offset.

| Covariate | Chisq | Df | Pr(>Chisq) |
| --- | --- | --- | --- |
| Site | 4.68 | 1 | 0.03 |
| Month | 3.09 | 4 | 0.54 |
| Acropora_cover | 6.33 | 1 | 0.01 |

**Table S8.** Growth Anomaly **log(**severity) glmm, linear model transect ID specified as random effects. R2 = 0.37

| Covariate | Chisq | Df | Pr(>Chisq) |
| --- | --- | --- | --- |
| Site | 1.91 | 1 | 0.16 |
| Month | 12.14 | 4 | 0.02 |
| Site:Month | 2.50 | 2 | 0.29 |
